# Supplementary material for: In Search of the Elusive North: Evolutionary History of the Arctic Fox (Vulpes lagopus) in the Palearctic from the Late Pleistocene to the Recent Inferred from Mitogenomic Data
Source: MDPI journal article supplement (doi:10.3390/biology12121517), 2023-12-12
Supplement: s1 [file s1]

**Table S1. Total DNA concentration.**

| Sample | DNA Concentration (ng/μl) |
|--------|---------------------------|
| Lib2   | 9.92                      |
| Lib3   | 0.114                     |
| Lib4   | 0.301                     |
| Lib5   | 0.817                     |
| Lib6   | 0.451                     |
| N58    | 20.9                      |
| VS5    | >100                      |

**Table S2. Sequencing data.**

| ID   | Number of Raw Reads, MM | % Duplicates | Average Reads Length after Trimming, bp |
|------|-------------------------|--------------|-----------------------------------------|
| Lib2 | 168.8                   | 49.9         | 125                                     |
| Lib3 | 69.3                    | 93.0         | 133                                     |
| Lib4 | 101.7                   | 78.6         | 129                                     |
| Lib5 | 69.7                    | 90.0         | 124                                     |
| Lib6 | 117.0                   | 59.0         | 128                                     |
| N58  | 2.9                     | 9.6          | 124                                     |
| VS5  | 14.9                    | 15.0         | 144                                     |

**Table S3. Substitution models.**

| Group | Model | Number of Sites | Partitions                                                                                                                                                    |
|-------|-------|-----------------|---------------------------------------------------------------------------------------------------------------------------------------------------------------|
| 1     | GTR+I | 7722            | pos1_COX2, pos1_CYTB, tRNA-Arg, tRNA-Glu, tRNA-Ile<br>tRNA-Leu, pos1_COX3, tRNA-Pro, pos1_ND3, pos1_ND4l<br>tRNA-Ser, tRNA-Leu, tRNA-Met, tRNA-Cys, rRNA_12S, |

|   |         |      |                                                                                                                                                                                                 |
|---|---------|------|-------------------------------------------------------------------------------------------------------------------------------------------------------------------------------------------------|
|   |         |      | tRNA-Val, pos1_ATP6, tRNA-Ser, tRNA-Asn, pos1_ND1, pos1_ND2, tRNA-Tyr, pos1_COX1, pos1_ND6, rRNA_16S, tRNA-Lys, pos1_ND5, tRNA-Phe, pos1_ATP8, pos1_ND4, tRNA-Thr, tRNA-His, tRNA-Ala, tRNA-Tyr |
| 2 | HKY+I   | 3940 | pos2_ND2, tRNA-Gly, tRNA-Asp, pos2_CYTB, pos2_COX1, pos2_ND5, pos2_ATP6, pos2_ND3, pos2_ND4, tRNA-Gln, pos2_COX2, pos2_ND1, pos2_ND4L, pos2_ND6, pos2_COX3                                      |
| 3 | GTR+G   | 3800 | pos3_COX2, pos3_ND2, pos3_COX1, pos3_ATP8, pos3_COX3, pos3_ND5, pos3_ND6, pos3_ND1, pos3_ND4, pos3_CYTB, pos3_ND4L, pos3_ATP6, pos3_ND3                                                         |
| 4 | GTR+I+G | 1339 | D-loop, pos2_ATP8                                                                                                                                                                               |

Lib2

5' end

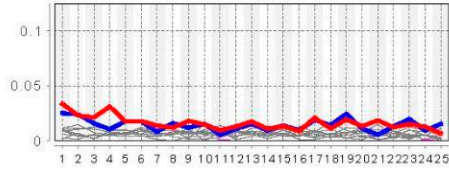

3' end

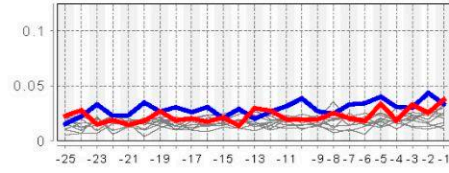

Lib3

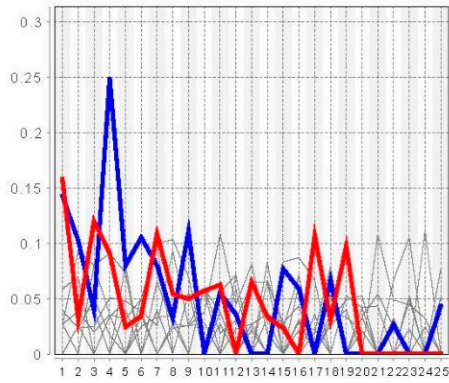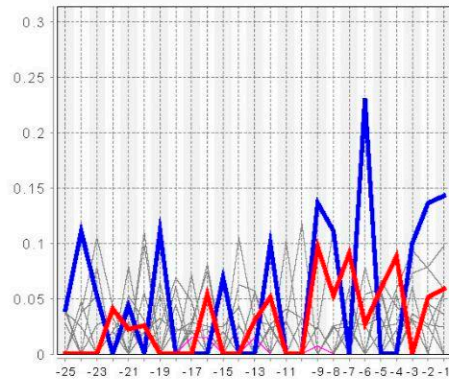

Lib4

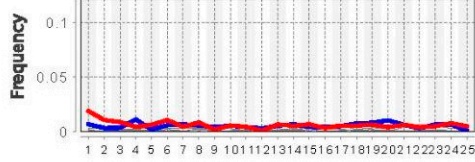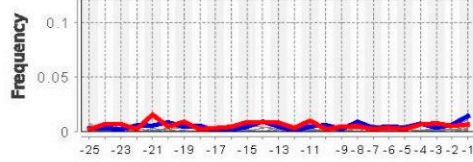

Lib5

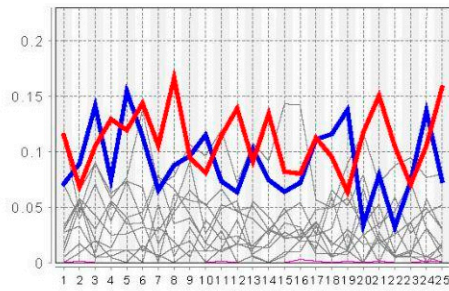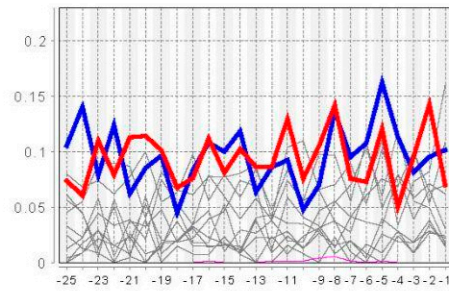

Lib 6

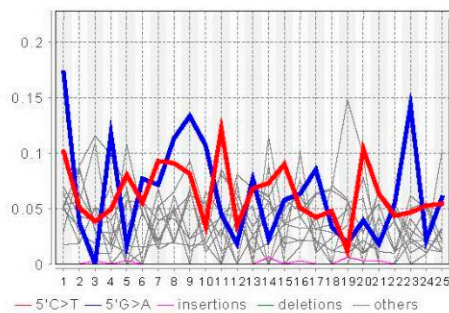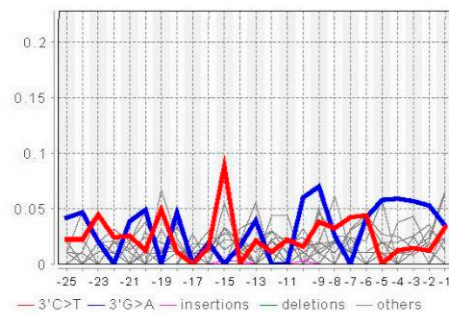

— 5'C>T — 5'G>A — insertions — deletions — others

— 3'C>T — 3'G>A — insertions — deletions — others

**Figure S1. Ancient DNA damage patterns (Lib2–6).** The nucleotide positions of the 5' and 3' ends of the reads are shown on the horizontal axis, with the proportion of incorrectly inserted bases represented on the vertical axis. The red and blue colors indicate cytosine-to-thymine substitution and guanine-to-adenine substitution, respectively. Insertions are shown in pink, deletions in green.

**Table S4. Metagenomic analysis results of ancient and museum samples of arctic fox.**

| LAB_ID | Number of Raw Reads | Classified Reads <sup>1</sup> | Unclassified Reads | Microbial Reads | Chordate Reads | Canidae Reads      |
|--------|---------------------|-------------------------------|--------------------|-----------------|----------------|--------------------|
| Lib2   | 127,039,521         | 61.8%                         | 38.2%              | 56%             | 5.36%          | 2.21% (2,805,236)  |
| Lib3   | 53,124,906          | 48.5%                         | 51.5%              | 35.3%           | 11.9%          | 3.64% (1,933,909)  |
| Lib4   | 75,597,943          | 60.1%                         | 39.9%              | 43.6%           | 16.1%          | 11.90% (8,992,487) |
| Lib5   | 43,505,102          | 47.5%                         | 52.5%              | 35.3%           | 11.5%          | 6.11% (2,659,135)  |
| Lib6   | 85,793,479          | 57.6%                         | 42.4%              | 53.8%           | 3.43%          | 0.14% (116,518)    |
| N58    | 2,301,319           | 86.7%                         | 13.3%              | 29.9%           | 55.2%          | 43.3% (997,317)    |
| VS5    | 7,483,996           | 94.6%                         | 5.37%              | 5.1%            | 89.4%          | 84.5% (6,328,500)  |

<sup>1</sup>The percentage in all columns is specified from the total number of reads.

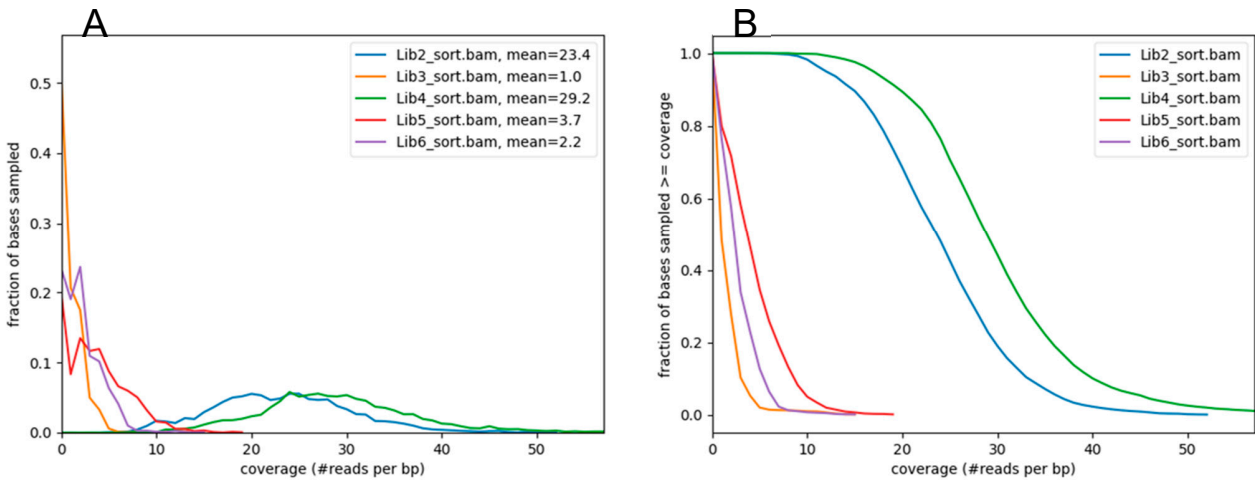

**Figure S2. Ancient samples reference genome mapping coverage (Lib2–Lib6).** (A) Plot represents the frequencies of the found read coverages and the mean coverage value in the upper right corner. (B) Plot represents the fraction of the genome that has a specified depth of sequencing.

Lib2

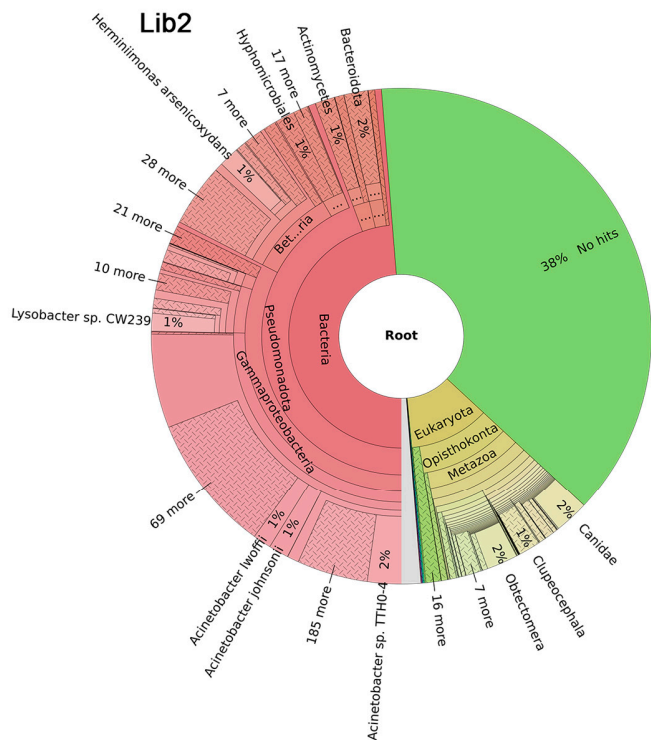

Lib3

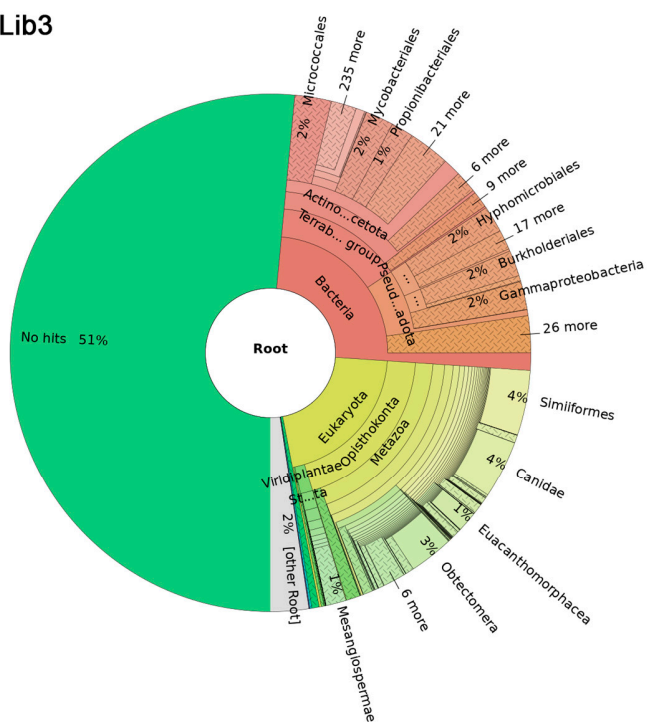

Lib4

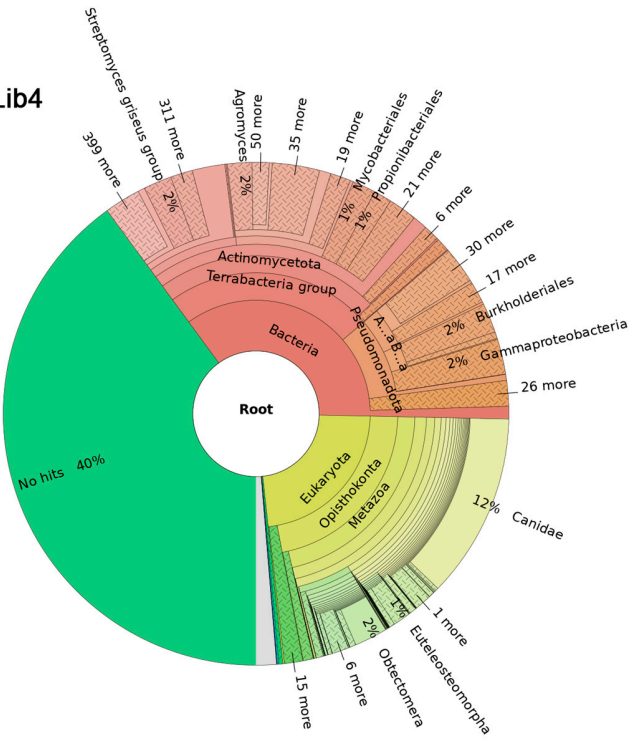

Lib5

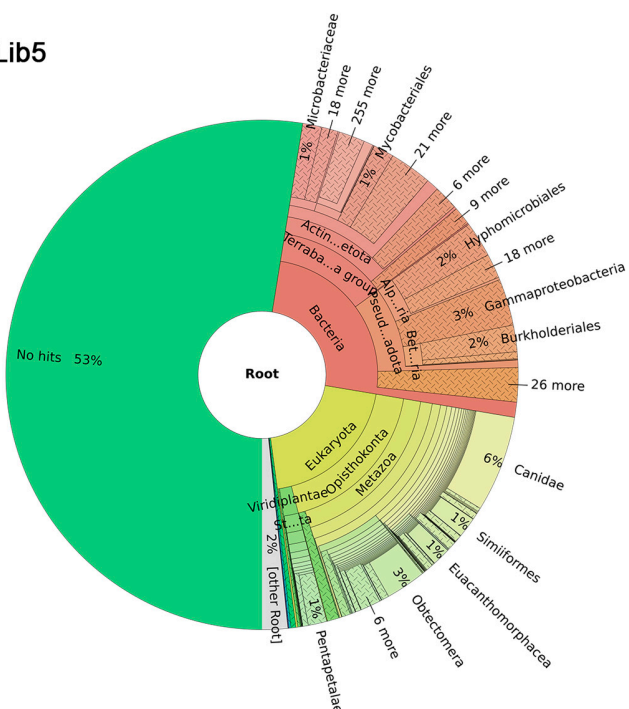

Lib6

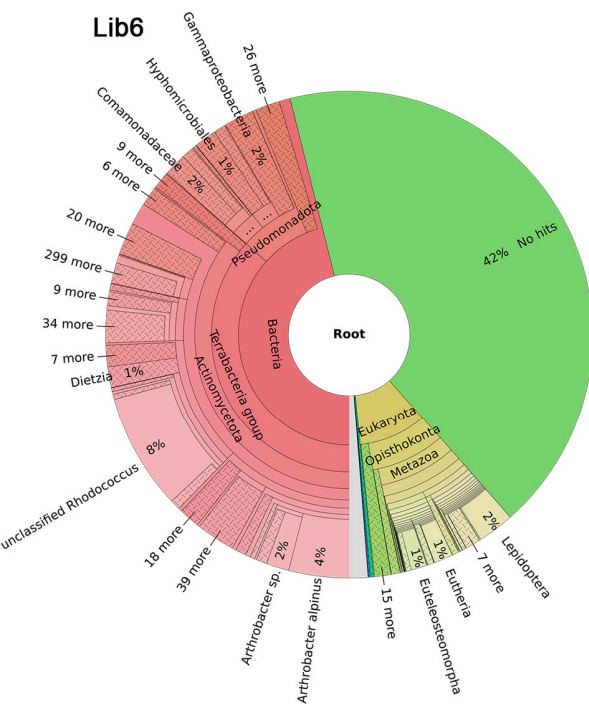



VS5

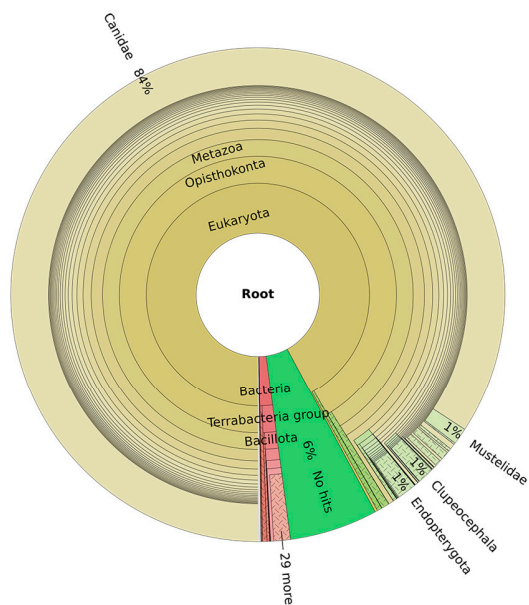

58

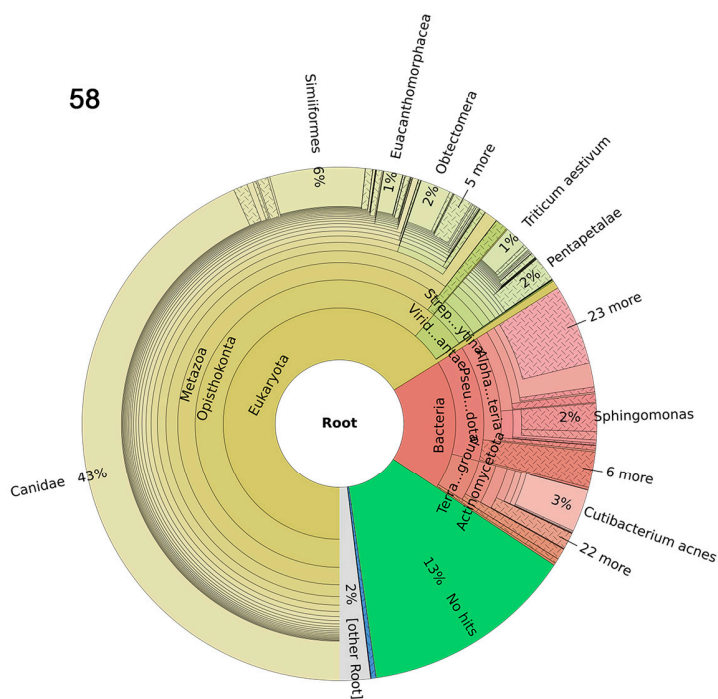

Figure S3. Pie charts illustrate results of metagenomic analysis for all specimens.

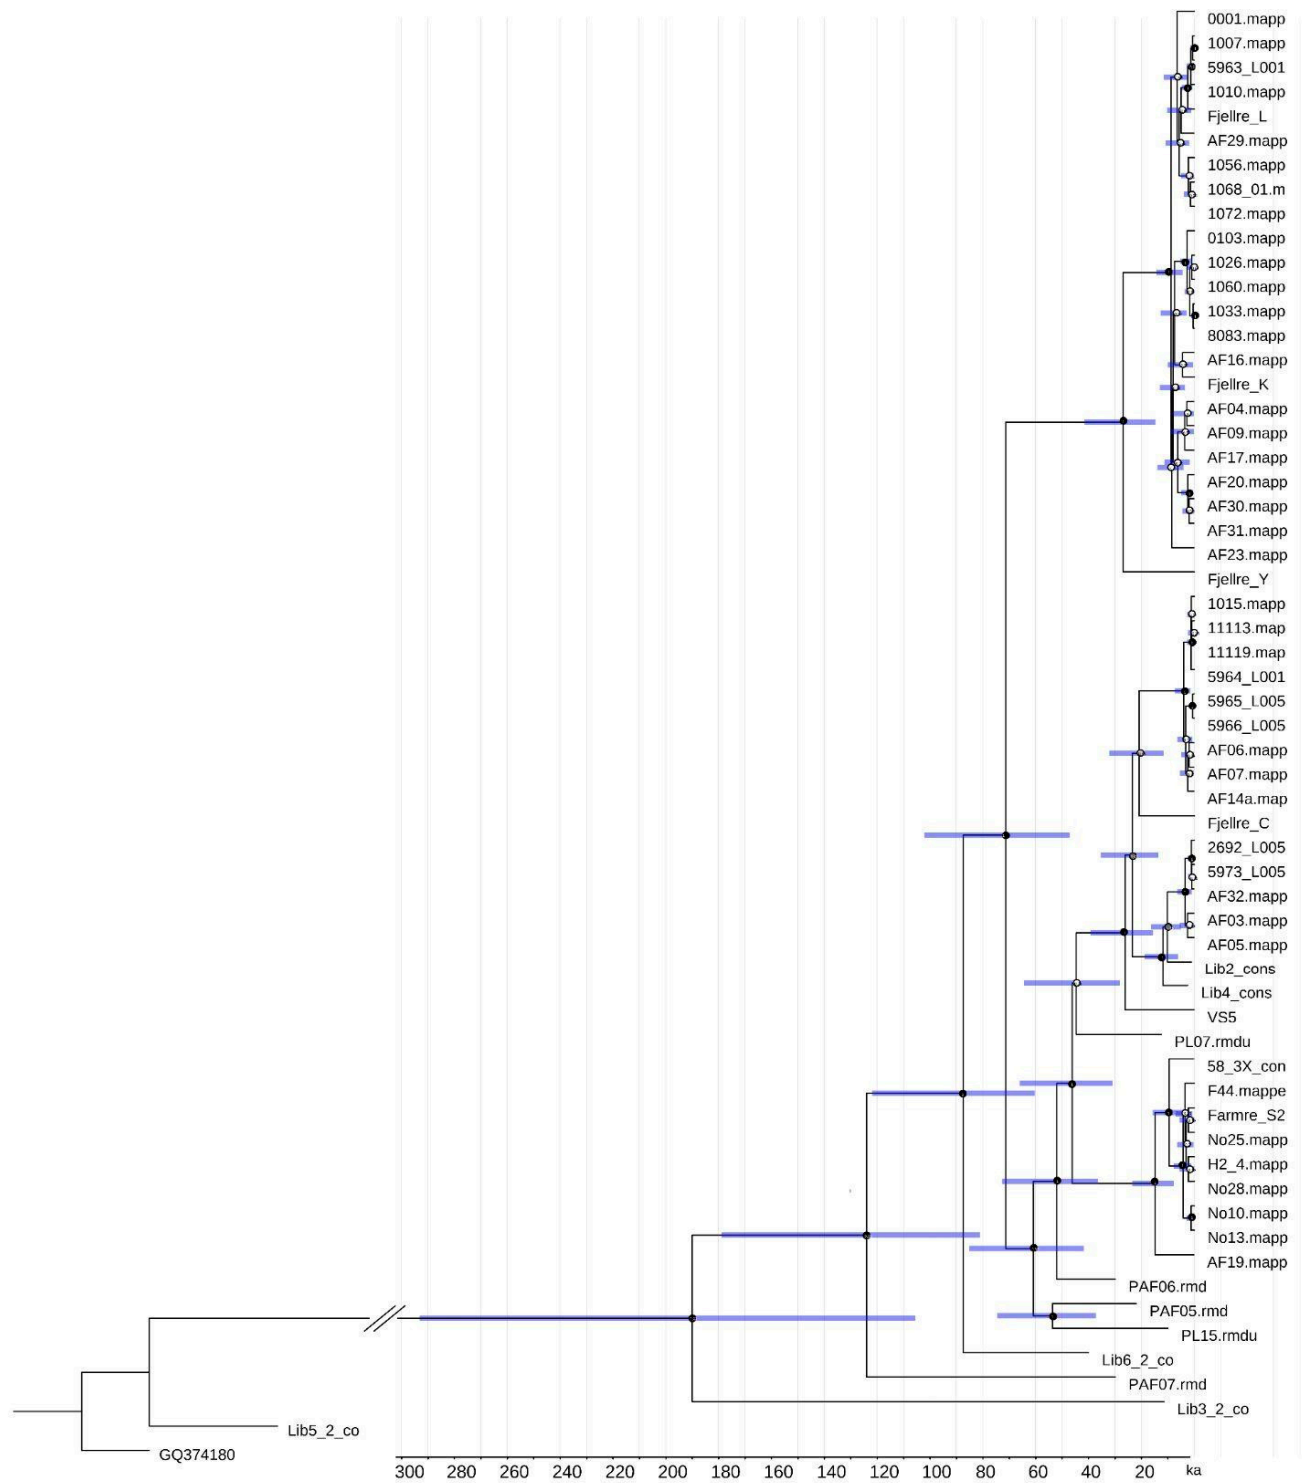

Figure S4. Phylogenetic tree without labels compression.
